# Supplementary material for: Characterising the gut microbiome in veterans with Gulf War Illness: a protocol for a longitudinal, prospective cohort study
Source: PubMed Central journal article supplement — BMJ Open. 2019 Aug 19;9(8):e031114. doi: 10.1136/bmjopen-2019-031114 (PMC6707676; doi:10.1136/bmjopen-2019-031114), 2019-08-19
Supplement: bmjopen-2019-031114.reviewer_comments.pdf [file bmjopen-2019-031114.reviewer_comments.pdf]

## PEER REVIEW HISTORY

BMJ Open publishes all reviews undertaken for accepted manuscripts. Reviewers are asked to complete a checklist review form (<http://bmjopen.bmj.com/site/about/resources/checklist.pdf>) and are provided with free text boxes to elaborate on their assessment. These free text comments are reproduced below.

## ARTICLE DETAILS

|                            |                                                                                                                                                                                                                       |
|----------------------------|-----------------------------------------------------------------------------------------------------------------------------------------------------------------------------------------------------------------------|
| <b>TITLE (PROVISIONAL)</b> | Characterizing the gut microbiome in Veterans with Gulf War Illness:<br>A protocol for a longitudinal, prospective cohort study                                                                                       |
| <b>AUTHORS</b>             | Keating, Julie; Shaughnessy, Catherine; Baubie, Kelsey; Kates, Ashley; Putman-Buehler, Nathan; Watson, Lauren; Dominguez, Nadia; Watson, Kal; Cook, Dane; Rabago, David; Suen, Garret; Gangnon, Ronald; Safdar, Nasia |

This article was not externally reviewed at BMJ Open. Protocols that have been independently assessed prior to submission to BMJ Open are usually fast-tracked to publication on the grounds that further substantial changes will not be possible. This independent assessment will usually be external, independent review for both a substantial grant award from a non-commercial or government funder and ethics approval.
